# Supplementary material for: Pulmonary delivery of triptolide-loaded liposomes decorated with anti-carbonic anhydrase IX antibody for lung cancer therapy
Source: Sci Rep. 2017 Apr 20;7:1097. doi: 10.1038/s41598-017-00957-4 (PMC5430522; doi:10.1038/s41598-017-00957-4)
Supplement: Supplementary file 1 — Supplemental information [file 41598_2017_957_MOESM1_ESM.pdf]

## **Supplemental information**

### **Pulmonary delivery of triptolide-loaded liposomes decorated with anti-carbonic anhydrase IX antibody for lung cancer therapy**

**Congcong Lin<sup>1</sup>, Blenda Chi Kwan Wong<sup>1</sup>, Hubiao Chen<sup>1</sup>, Zhaoxiang Bian<sup>1</sup>, Ge Zhang<sup>1</sup>, Xue Zhang<sup>1</sup>, Muhammad Kashif Riaz<sup>1</sup>, Deependra Tyagi<sup>1</sup>, Ge Lin<sup>3</sup>, Yanbo Zhang<sup>4</sup>, Jinjin Wang<sup>2</sup>, Aiping Lu<sup>1,2,\*</sup>, Zhijun Yang<sup>1,2,\*</sup>**

<sup>1</sup>School of Chinese Medicine, Hong Kong Baptist University, 7 Baptist University Road, Kowloon Tong, Hong Kong, China

<sup>2</sup>Changshu Research Institute, Hong Kong Baptist University, Changshu Economic and Technological Development (CETD) Zone, Changshu 215500, China

<sup>3</sup> School of Biomedical Sciences, Chinese University of Hong Kong, Area 39, CUHK, Shatin, NT, Hong Kong, China

<sup>4</sup>School of Chinese Medicine, Li Ka Shing Faculty of Medicine, The University of Hong Kong, 10 Sassoon Road, Pokfulam, Hong Kong, China

\* Corresponding author.

Correspondence and requests for materials should be addressed to Z.Y. (email: yzhijun@hkbu.edu.hk;

Tel.: +852-3411-2961; fax: +852-34112461)

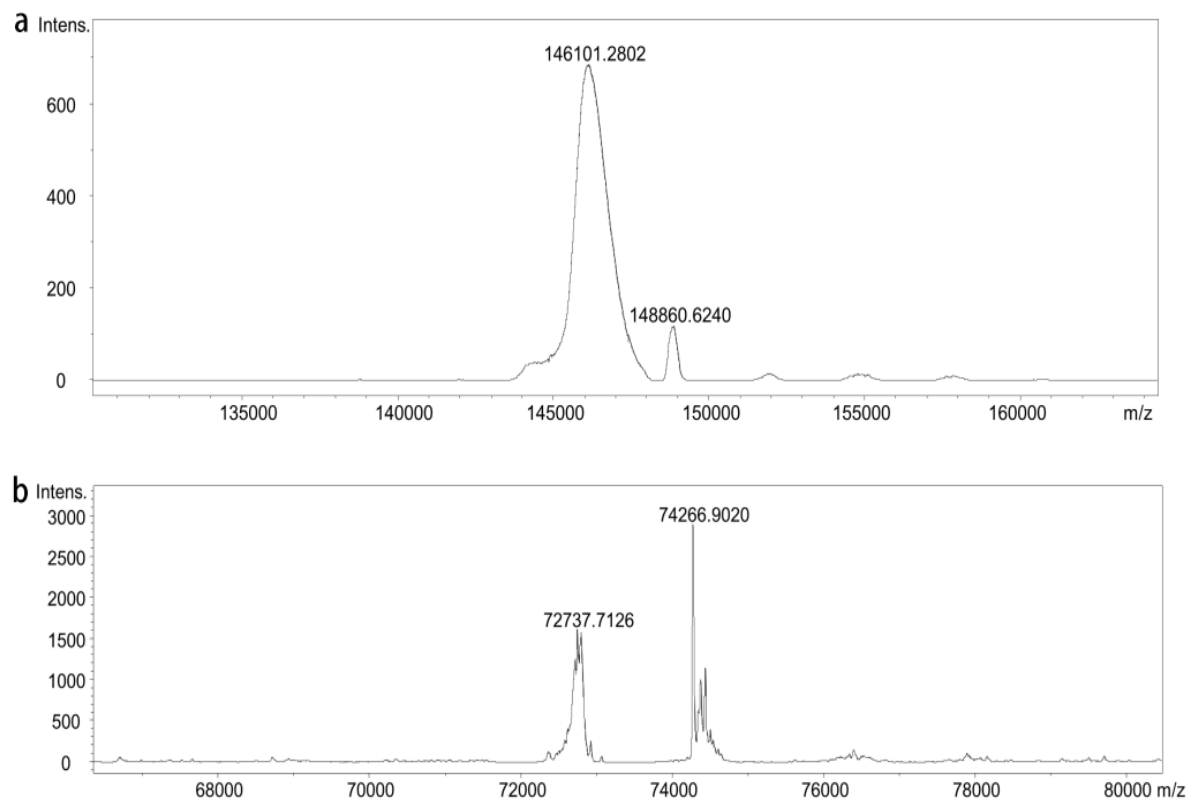

**Figure S1.** UPLC Q-TOF MS spectra of (a) Anti-CA IX antibody and (b) Reduced anti-CA IX antibody.

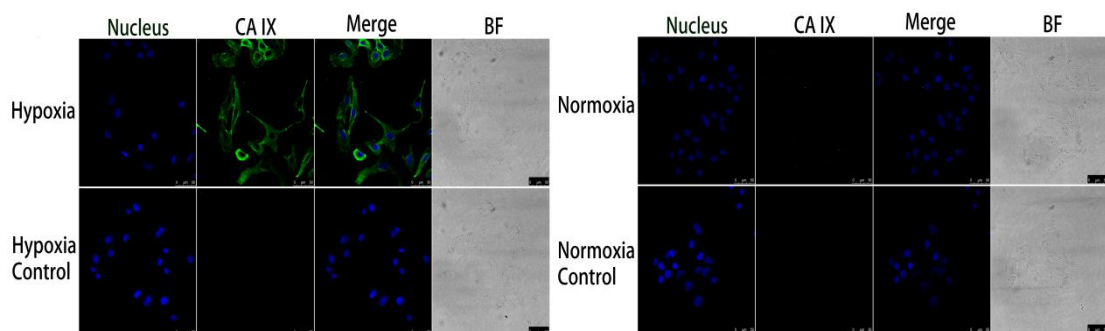

**Figure S2.** Expression of CA IX on cell membranes detected with FITC-conjugated goat anti-mouse secondary antibody (green) by confocal laser scanning microscopy. The control cells were not pretreated with primary monoclonal anti-CA IX antibody, but only treated with FITC-conjugated secondary antibody. Nuclei were stained with Hoechst 33342 (blue).

Scale bars, 50  $\mu\text{m}$ .

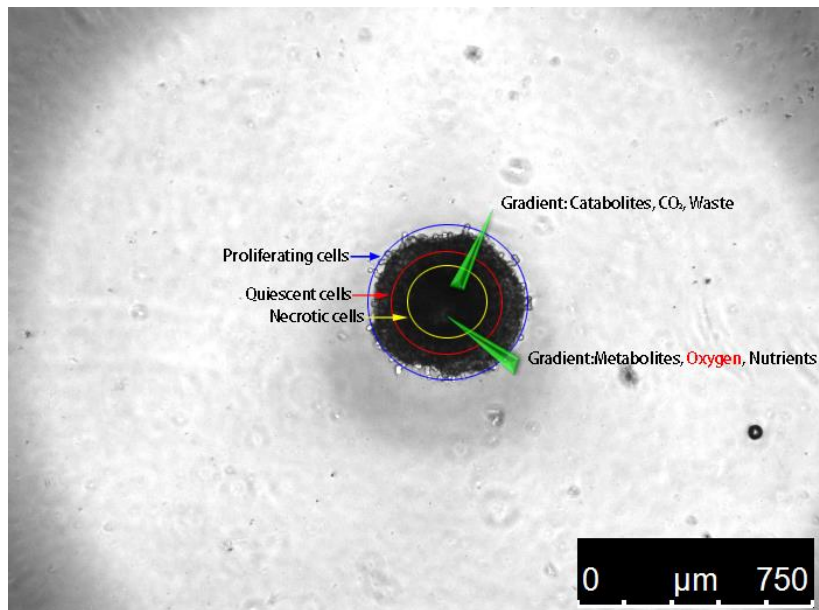

**Figure S3.** Brightfield image of A549 tumor spheroid captured by optical microscope with pathophysiological gradients schematically reported.

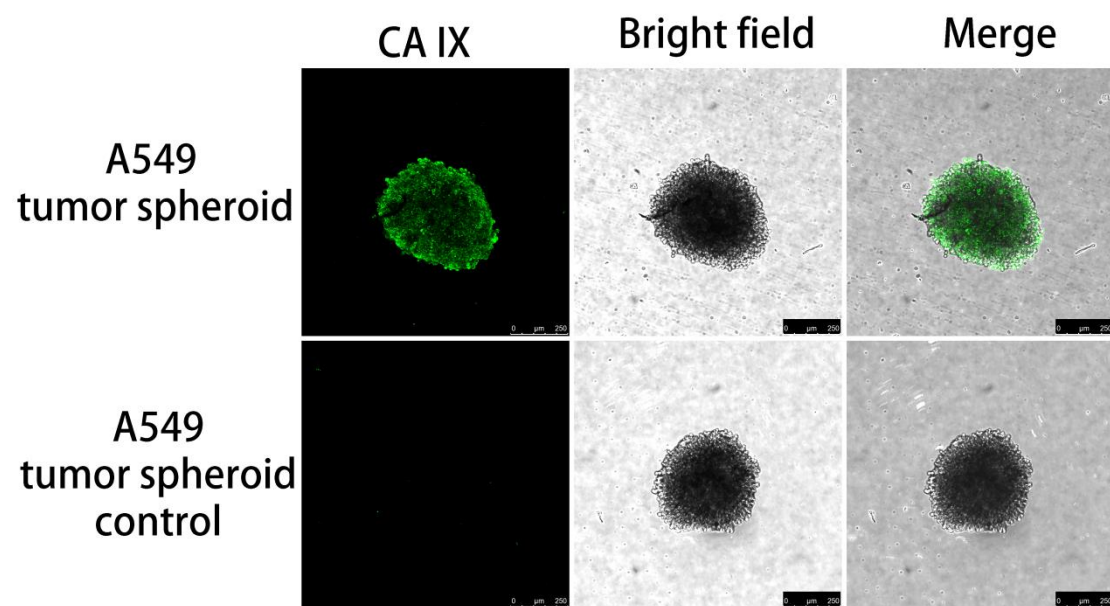

**Figure S4.** Expression of CA IX in A549 3D tumors. Confocal images of CA IX expression, detected with FITC-conjugated goat anti-mouse secondary antibody (green); The control A549 tumor spheroid were not pretreated with primary monoclonal anti-CA IX antibody, but only treated with FITC-conjugated secondary antibody. Scale bars, 250  $\mu\text{m}$ .

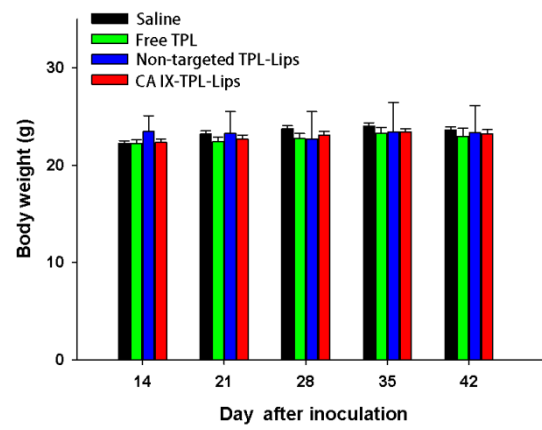

**Figure S5.** Body weights of mice receiving TPL formulations intratracheally.
